# Supplementary material for: Fabrication of carbon nanospheres by the pyrolysis of polyacrylonitrile–poly(methyl methacrylate) core–shell composite nanoparticles
Source: publisher site journal article supplement (doi:10.3762/bjnano.8.190), 2017-09-11
Supplement: Additional file 1 [file 2190-4286-8-190-S1.pdf]

Supporting Information

for

**Fabrication of carbon nanospheres by the  
pyrolysis of polyacrylonitrile–poly(methyl  
methacrylate) core–shell composite  
nanoparticles**

Dafu Wei<sup>1</sup>, Youwei Zhang<sup>\*2</sup> and Jinping Fu<sup>2</sup>

Address: <sup>1</sup>Key Laboratory for Ultrafine Materials of Ministry of Education, School of Materials Science and Engineering, East China University of Science and Technology, Shanghai 200237, China, and <sup>2</sup>State Key Laboratory for Modification of Chemical Fibers and Polymer Materials, College of Materials Science and Engineering, Donghua University, Shanghai 201620, China

Email: Youwei Zhang\* - zhyw@dhu.edu.cn

\* Corresponding author

## **Additional Experimental Details**

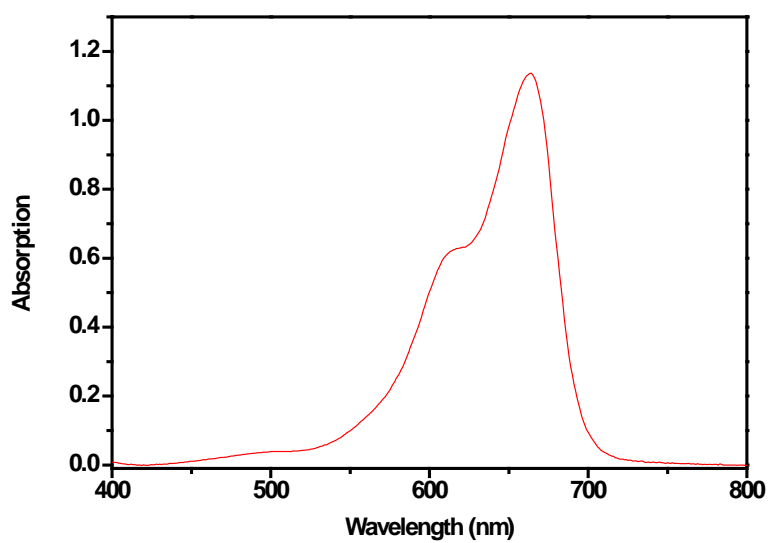

Figure S1: UV-vis spectrum of MB aqueous solution.

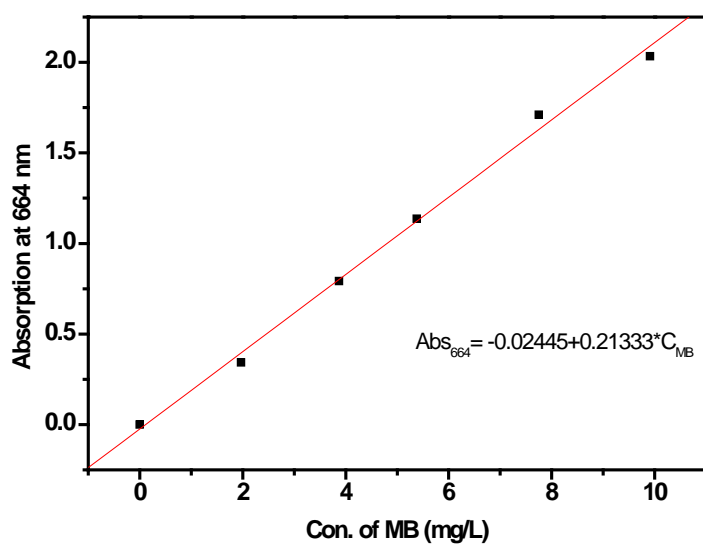

Figure S2: Calibration curve of MB aqueous solutions.

Table S1: Absorption of a series of MB aqueous solutions with known concentrations and supernatant of the MB/carbon-nanospheres/water mixture at  $\lambda = 664$  nm.

| Sample                                                                                                       | C of MB (mg/L)    | Absorption <sup>a</sup> |
|--------------------------------------------------------------------------------------------------------------|-------------------|-------------------------|
| MB aqueous solution                                                                                          | 1.97              | 0.3425                  |
|                                                                                                              | 3.87              | 0.7918                  |
|                                                                                                              | 5.38              | 1.1367                  |
|                                                                                                              | 7.75              | 1.7106                  |
|                                                                                                              | 9.91              | 2.0327                  |
| Supernatant obtained by centrifuging the MB/carbon-nanospheres/water mixture after the adsorption experiment | 2.14 <sup>b</sup> | 0.4313                  |

<sup>a</sup>average value for three measurements; <sup>b</sup>calculated according to the calibration equation displayed in Figure S2.

Table S2: Content of elements C, H and N of PAN seed nanoparticles and PAN-PMMA composite nanoparticles.

| Sample    | <i>FVR</i><br>(MMA/AN,v/v) | C(%)  | H(%)  | N(%)  | <i>WR</i> <sup>a</sup> |
|-----------|----------------------------|-------|-------|-------|------------------------|
| PAN latex | -                          | 67.14 | 5.749 | 25.72 | -                      |
| PAN-PMMA1 | 0.8                        | 63.32 | 7.047 | 12.04 | 1.136                  |
| PAN-PMMA2 | 1.6                        | 62.23 | 7.456 | 7.942 | 2.238                  |
| PAN-PMMA3 | 2.4                        | 61.71 | 7.603 | 6.154 | 3.179                  |

<sup>a</sup>The weight ratios (*WR*) of PMMA to PAN of the PAN-PMMA nanoparticles were estimated from the N content of the PAN seed nanoparticles and the PAN-PMMA nanoparticles determined by elemental analysis.

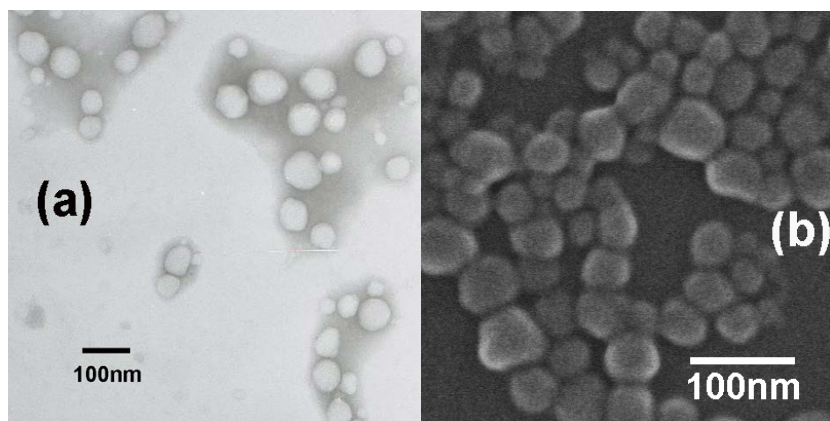

Figure S3: TEM (a) and SEM (b) micrographs of PMMA nanoparticles.

Table S3: Average particle diameters by TEM ( $D_{\text{TEM}}$ ) and DLS ( $\langle D_h \rangle$ ) measurements of PAN seed nanoparticles and PAN-PMMA composite nanoparticles.

| Sample                                          | $D_{\text{TEM}}$ (nm) | $\langle D_h \rangle$ (nm) <sup>a</sup> |
|-------------------------------------------------|-----------------------|-----------------------------------------|
| PAN                                             | 90±16                 | 97±1                                    |
| PAN-PMMA1                                       | 105±20                | 122±3                                   |
| PAN-PMMA2                                       | 146±12                | 154±2                                   |
| PAN-PMMA3                                       | 174±10                | 178±6                                   |
| PAN-PMMA1 treated by 50% NaSCN aqueous solution | 120±13                |                                         |

<sup>a</sup>The average value and standard error for the z-average hydrodynamic diameters of three measurements.

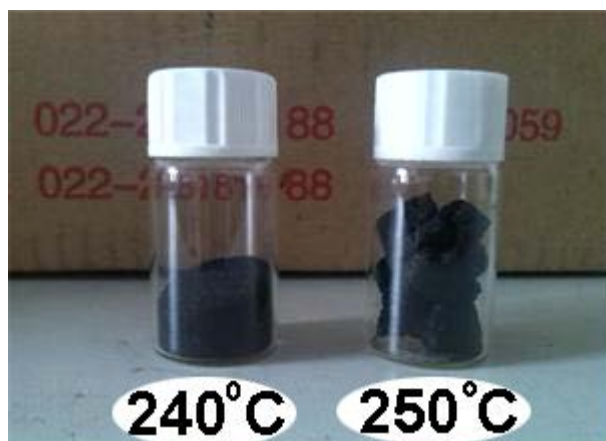

Figure S4: Pre-oxidized products obtained after pre-oxidizing PAN-PMMA2 nanoparticles at 240 °C and 250 °C.

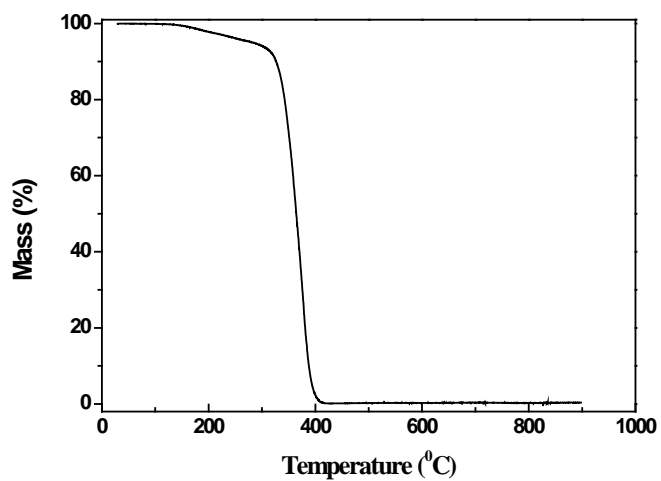

Figure S5: Thermogravimetric (TG) curve of PMMA nanoparticles at a heating rate of 10 °C/min under nitrogen protection.

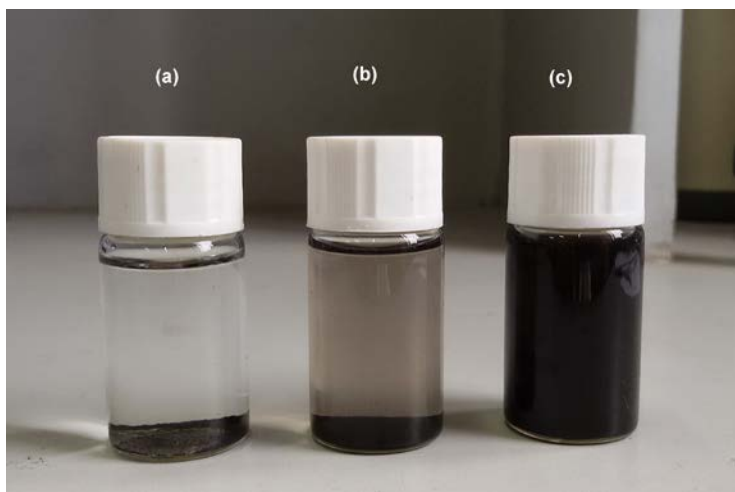

Figure S6: The appearance of acetone dispersions of three carbonized products (the ultrasonication was used for dispersing various carbonized products in acetone) of PAN nanoparticles (a), PAN-PMMA1 nanoparticles (b) and PAN-PMMA2 nanoparticles (c) after overnight storage.

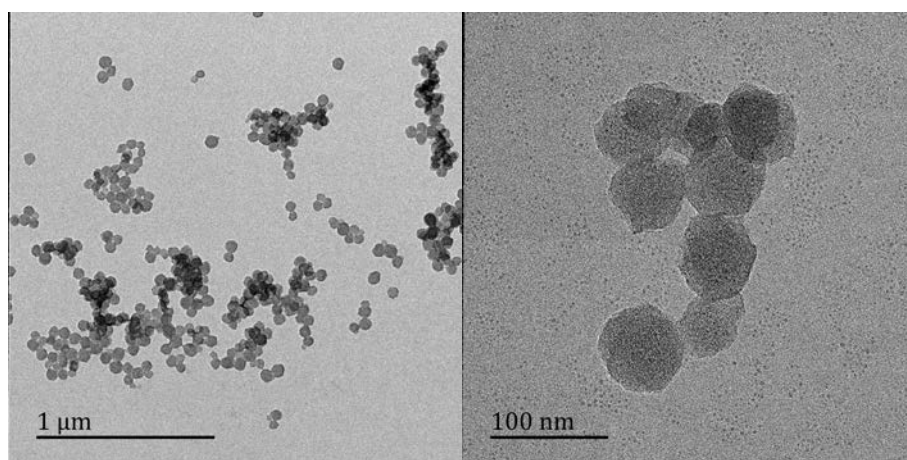

Figure S7: TEM images of carbonized products obtained after successively subjecting the PAN-cPMMA2 nanoparticles with DVB-crosslinked PMMA shell to pre-oxidation treatment at 250 °C and two carbonization treatments at 600 °C and 1000 °C.

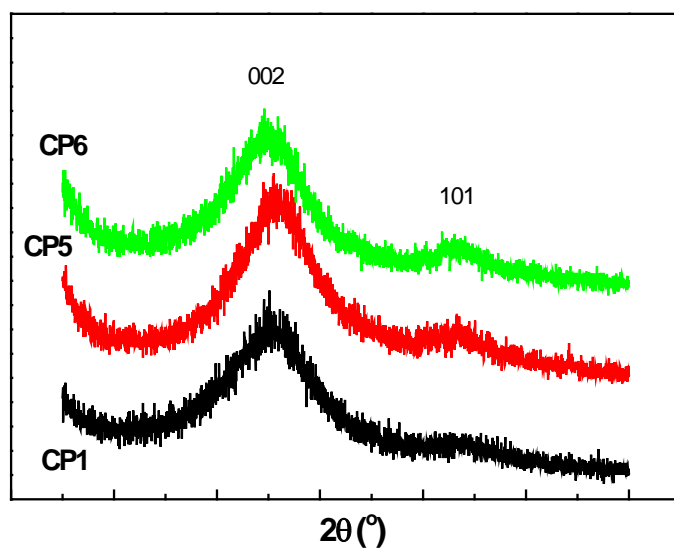

Figure S8: X-ray diffraction patterns of carbonized samples CP1, CP5 and CP6.

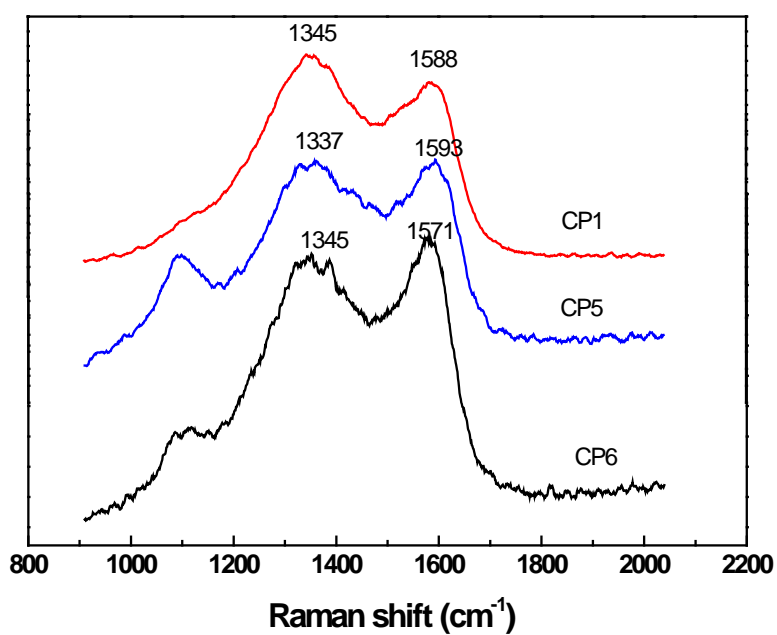

Figure S9: Raman spectra of carbonized samples CP1, CP5 and CP6.

Table S4: Raman shift, full width at half maximum and intensity of D band and G band of three carbon nanospheres obtained by Gauss fitting.

| Sample | D Band                              |                                           |                     | G Band                              |                                           |                     | $I_D/I_G$ |
|--------|-------------------------------------|-------------------------------------------|---------------------|-------------------------------------|-------------------------------------------|---------------------|-----------|
|        | Raman shift<br>( $\text{cm}^{-1}$ ) | FWHM <sup>a</sup><br>( $\text{cm}^{-1}$ ) | Intensity<br>(a.u.) | Raman shift<br>( $\text{cm}^{-1}$ ) | FWHM <sup>a</sup><br>( $\text{cm}^{-1}$ ) | Intensity<br>(a.u.) |           |
| CP1    | 1352.9                              | 290                                       | 154                 | 1578.6                              | 133                                       | 51.9                | 2.97      |
| CP5    | 1367.3                              | 274                                       | 155                 | 1591.2                              | 121                                       | 56.6                | 2.74      |
| CP6    | 1362.4                              | 272                                       | 114                 | 1580.4                              | 116                                       | 43.7                | 2.61      |

<sup>a</sup>FWHM - full width at half maximum.
